# Supplementary material for: A dual-responsive polyurethane nanocarrier for drug release triggered by intracellular GSH and NQO1 enzyme
Source: Royal Society of Chemistry journal article supplement (doi:10.1039/d4py00320a), 2024-01-01
Supplement: d4py00320a1.pdf [file d4py00320a1.pdf]

## Supporting information

# A Dual-Responsive Polyurethane Nanocarrier for Drug Release Triggered by Intracellular GSH and NQO1 Enzyme

Shuai Yang<sup>a</sup>, Jinhai Xie<sup>a</sup>, Dongdong Wang<sup>a</sup>, Shuangyu Tian<sup>a</sup>, Yaodong Di<sup>a</sup> and  
Lesan Yan<sup>a, b\*</sup>

<sup>a</sup> State Key Laboratory of Advanced Technology for Materials Synthesis and Processing, Biomedical Materials and Engineering Research Center of Hubei Province, Wuhan University of Technology, Wuhan 430070, China.

E-mail: lsyan@whut.edu.cn

<sup>b</sup> Wuhan University of Technology Advanced Engineering Technology Research Institute of Zhongshan City, Zhongshan 528400, China

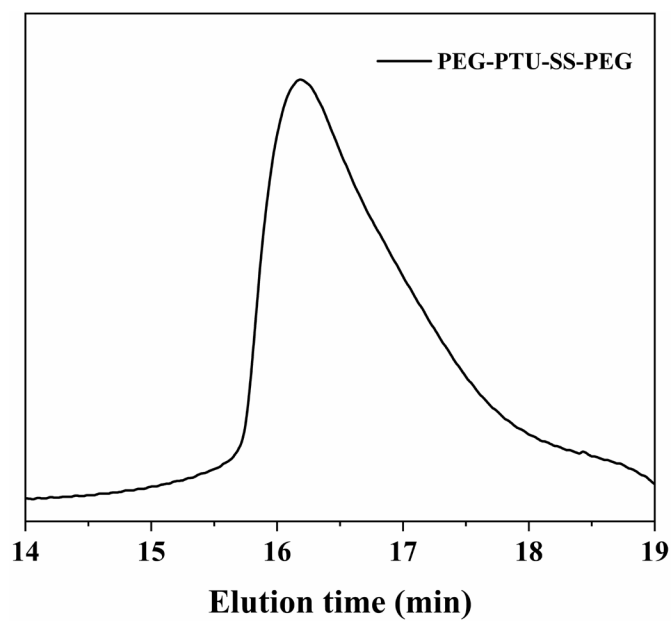

**Figure S1.** GPC curves of polymer PEG-PTU-SS-PEG.

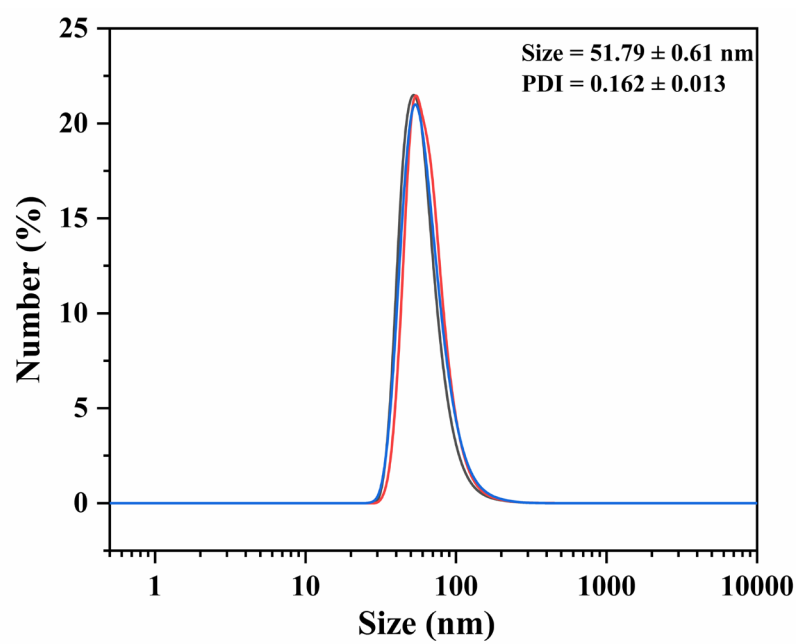

**Figure S2.** Statistical data for DLS of PEG-PTU-SS-PEG blank micelle (n = 3).

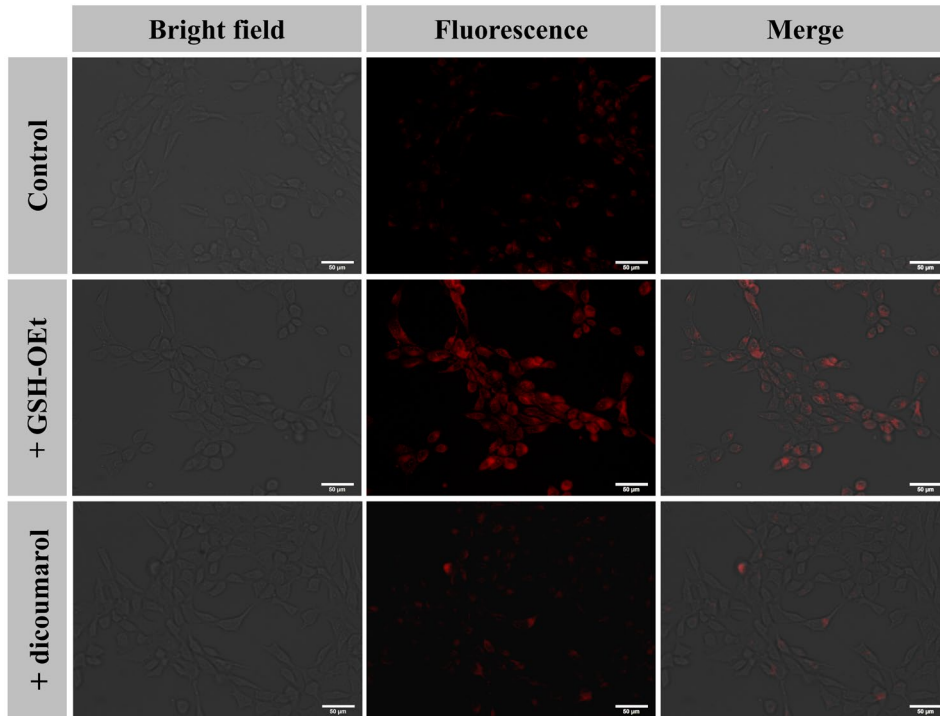

**Figure S3.** Fluorescence images of DOX-loaded micelles endocytosed by NIH-3T3 cells.

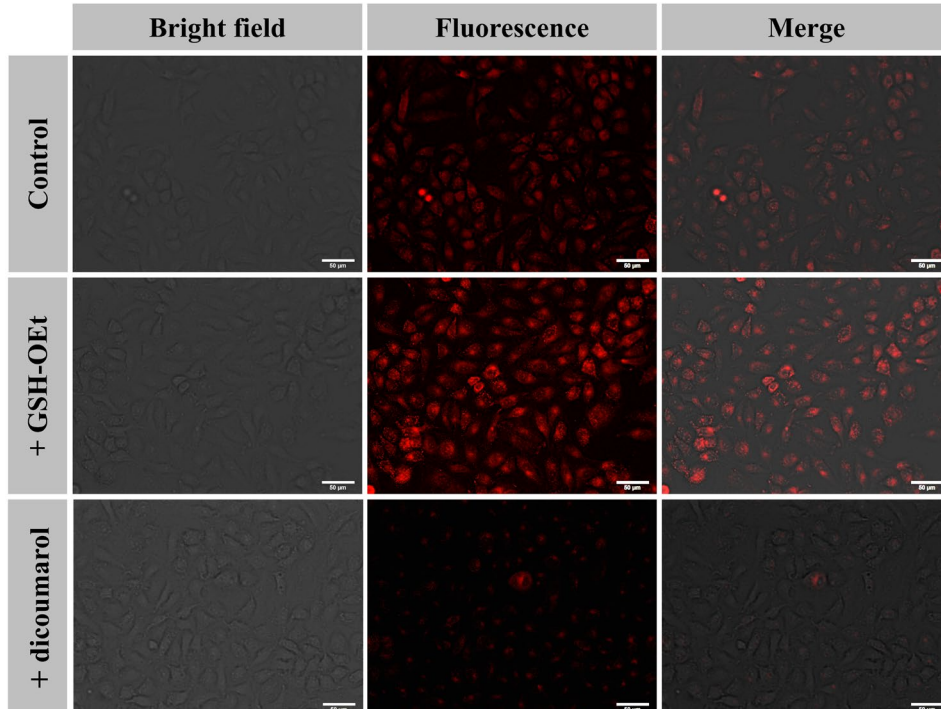

**Figure S4.** Fluorescence images of DOX-loaded micelles endocytosed by A549 cells.

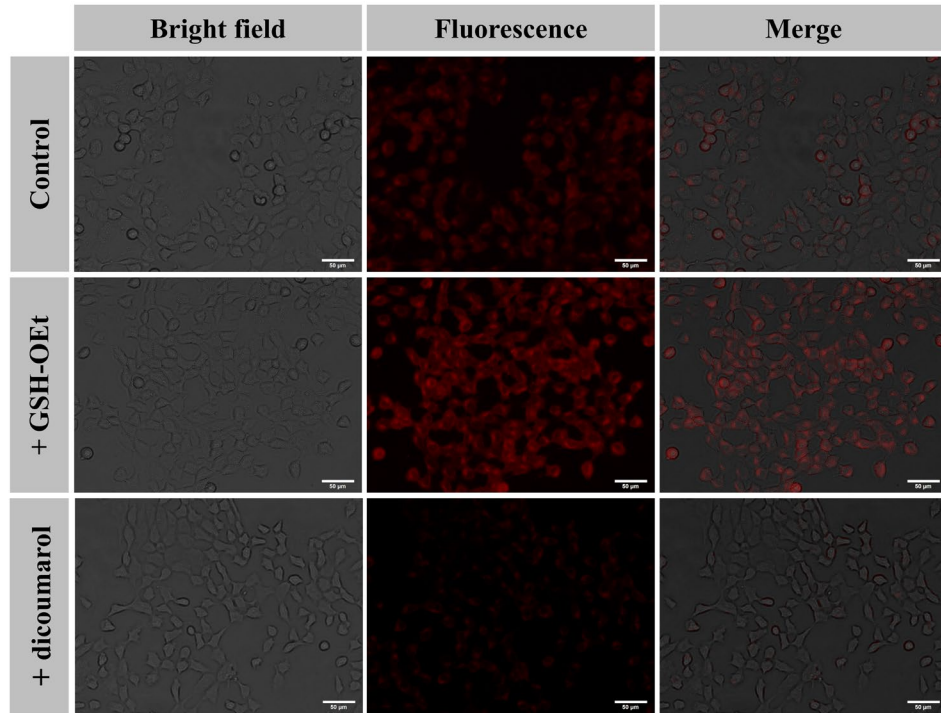

Figure S5. Fluorescence images of DOX-loaded micelles endocytosed by 4T1 cells.

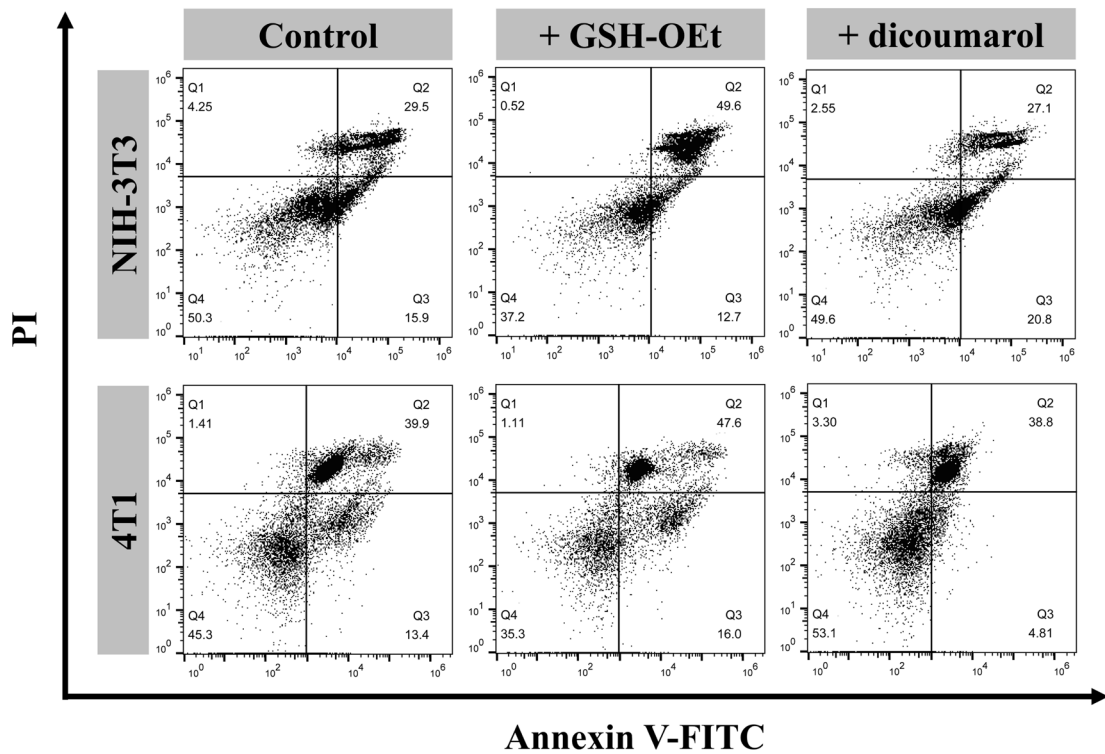

Figure S6. Flow cytometry analysis of apoptosis in NIH-3T3 cells and 4T1 cells under different conditions.
